# Supplementary material
Source: PubMed Central journal article supplement (PMC4775251)
Supplement: NIHMS715870-supplement-1.pdf [file NIHMS715870-supplement-1.pdf]

# Interactive analysis and assessment of single-cell copy-number variations

---

Tyler Garvin, Robert Aboukhalil, Jude Kendall, Timour Baslan, Gurinder S. Atwal, James Hicks, Michael Wigler, Michael C. Schatz

## Supplementary Materials

|                                                                                                               |    |
|---------------------------------------------------------------------------------------------------------------|----|
| Supplementary Note 1: Replication of the single-cell analysis results.....                                    | 2  |
| Supplementary Table 1: Data processing options.....                                                           | 6  |
| Supplementary Table 2: Simulation accuracy.....                                                               | 7  |
| Supplementary Figure 1: Ginkgo analysis of the Navin et al. cancer data .....                                 | 8  |
| Supplementary Figure 2A: Comparison of segment medians between Ginkgo and McConnell .....                     | 9  |
| Supplementary Figure 2B: Comparing discordant segments between Ginkgo and McConnell .....                     | 10 |
| Supplementary Figure 2C: An analysis of discordant calls with respect to McConnell MAD values .....           | 11 |
| Supplementary Figure 3: Ginkgo patient clustering of Ni et al. CTC data .....                                 | 12 |
| Supplementary Figure 4: The median absolute deviation (MAD) of neighboring bins across 3 WGA approaches. .... | 13 |
| Supplementary Figure 5: Comparing breakpoint conservation between T10 and CTC.....                            | 14 |
| Supplementary Figure 6: Phylogenetic tree of the T10 cell population .....                                    | 15 |
| Supplementary Figure 7: A phylogenetic tree of the CTC single cell samples .....                              | 16 |
| Supplementary Figure 8: Histograms of normalized bin counts .....                                             | 17 |
| Supplementary Figure 9: Histograms of the scaled bin counts .....                                             | 18 |
| Supplementary Figure 10: Ginkgo clusters the Lu <i>et al.</i> sperm samples.....                              | 19 |

## Supplementary Note 1: Replication of the single-cell analysis results

### 1. Navin et al.

This work profiled breast cancer in two separate studies. The first (dataset T10) examined heterogeneity in a polygenomic breast tumor. CNV analysis and hierarchical clustering of 100 single-cells revealed three distinct clonal subpopulations present in the tumor. The second study (datasets T16M/P) examined a monogenomic breast tumor and its suspected liver metastasis. CNV analysis and hierarchical clustering of 100 cells revealed that a single clonal expansion formed the primary breast tumor and seeded the metastasis. In the polygenomic breast tumor analysis, Ginkgo clusters all 100 samples into the same four distinct subpopulations of the original study, replicating the published population structure (**Supplementary Figure 1A**). In the monogenic breast tumor and its associated liver metastasis analysis, Ginkgo clusters all 100 samples into the same three distinct subpopulations as the original publication, linking the primary tumor to its metastasis (**Supplementary Figure 1B**).

### 2. McConnell et al.

This study profiled CNV events in human hiPSC-derived fibroblasts and 110 frontal cortex neurons. McConnell *et al.* found a wide degree of mosaic copy-number variation in neurons and discovered that a subset of neurons have highly aberrant genomes. McConnell *et al.* identified a total of 148 CNVs across 45 of the 110 sequenced cortical neurons. They further present detailed information for the 148 CNV calls, including their genomic coordinates, the copy number assignments of the CNVs expressed as the median of the segment values, the genome-wide median segment value of diploid regions, and the median absolute deviation (MAD) score of the calls.

Using this information, we investigated the concordance between the CNVs Ginkgo reports to those reported by McConnell. To do so, we matched the parameters used by McConnell as closely as possible by using 500kbp variable length bins and requiring a minimum of 6 bins for a CNV. Note McConnell used a minimum of 5 bins for a CNV, although their bins average 686kbp long after accounting for mappability. We do not expect perfect concordance, as the two methods use different strategies and technical choices for identifying CNVs such as different strategies for mappability, normalization, and thresholding CNVs. Nevertheless, we find that the concordance is extremely high, with 99.7% bin-level concordance with Ginkgo

reporting 127 (85.8%) of the 148 CNVs identified by McConnell plus 116 additional CNV calls.

McConnell identifies CNVs whenever the median segment value is more than 2 MAD scores above or below the genome wide median. We investigated this relationship and found very strong correlation ( $R^2=0.996$ ) between Ginkgo's median segment values and McConnell's over these regions (**Supplementary Figure 2A**). Note the bin boundaries do not exactly coincide, due to different binning strategies and techniques to account for mappability, which introduces some variability in the segment coordinates. We investigated the most incongruent of those segments and observed that they were at the very beginning or very end of chromosomes in highly repetitive telomeric sequences (**Supplementary Figure 2B, top**). This suggests the differences were largely due to the details of how the reads were mapped and the bin boundaries were determined, especially since McConnell used default BWA parameters, while Ginkgo aggressively controls for multi-mapping reads and mapping quality scores in the analysis. In other cases, the median segment values of the discordant calls were virtually indistinguishable and yet not classified by Ginkgo as a CNV (**Supplementary Figure 2B, bottom**). In particular, Ginkgo and McConnell agree on all CNV calls when their segment MAD calls are greater than 2.35, but below that cutoff there are slight variations depending on the specific context of the segment (**Supplementary Figure 2C**). Finally, we speculate the additional 116 calls made by Ginkgo were just below the McConnell's thresholds for reporting a CNV (slightly below a MAD of 2.0), although the data are not available to directly compare.

### **3. Ni et al.**

This study explored SNPs and CNVs in circulating tumor cells (CTCs) in patients with lung cancer. Through CNV analysis and hierarchical clustering of 29 CTCs across 7 patients with lung adenocarcinoma (ADC) or small-cell lung cancer (SCLC) the authors discovered that CNVs appear specific to cancer types and are reproducible from cell to cell and from patient to patient. Using default settings in Ginkgo, we generate similar CN profiles for all 29 samples and can reproduce the published clustering results (**Supplementary Figure 3**).

### **4. Hou et al.**

This study sequenced the triads of first and second polar bodies (PB1 and PB2) and the oocyte pronuclei from same female egg donors to phase these genomes and determine their crossover maps and frequency. Additionally, genome-wide CN profiles were generated to explore aneuploidy in each sample. The authors identified a total of 47 CNVs in 25 aneuploid cells across 5 patients. We could

replicate these results as Ginkgo uncovered 45 of the 47 CNVs in 23 of the 25 identified aneuploid cells. One sample, S0808 (containing the missing two cells/CNVs), did not have CN events matching the published results. We believe this was due to accidental mislabeling of samples/sample IDs upon being deposited to NCBI.

### **5. Lu et al.**

In this study, single-cell sequencing of 99 sperm cells from an Asian male were used to examine meiotic recombination and aneuploidy. Across the 99 samples, the authors uncovered 5 aneuploid cells. As expected, our CNV analysis and hierarchical clustering using Ginkgo was able to separate the X and Y bearing chromosomes with the exception of two cells with extremely poor coverage uniformity and a high degree of read drop out that clustered separately (**Supplementary Figure 10**). In addition, we could cleanly replicate the CNV results as Ginkgo uncovered the same chromosomal aberrations in the five aneuploid cells as the original study.

### **6. Kirkness et al.**

This work profiled genomic variants in sperm with the goal of demonstrating a technique to retrieve complete haplotypes of sequenced genomes, information that is averaged out and lost during conventional genome sequencing approaches. Using genotype data from 16 cells and low coverage single-cell sequencing of 96 sperm cells, the authors leverage the haploid nature of sperm to identify recombination events at a median resolution less than 100 kb.

### **7. Wang et al.**

Much like *Kirkness et al.*, this work examined meiotic recombination and de novo mutations in sperm. Using a microfluidic system, the authors carried out single-cell sequencing on 91 sperm cells to generate a personal recombination map. This map was confirmed by the low-resolution afforded by bulk sequencing but individual samples were found to have significant differences from pedigree data at higher resolution. Finally, the authors used these results to test for meiotic drive, gene conversion, and genome instability. Deep sequencing of 8 single-cells revealed additional unique de novo mutations.

### **8. Evrony et al.**

This work looked to unravel to what extent genetic mosaicism exists in the brain of an individual. To this end the authors sequenced 300 single neurons from the cerebral cortex and caudate nucleus of three normal individuals. L1 insertion profiling led to estimate that there are less than  $< 0.6$  unique somatic L1 insertions per neuron with most neurons (~80%) lacking any detectable unique somatic mutations. Finally, the authors genotyped single cortical cells of a child with hemimegalencephaly to characterize the mosaicism of a somatic AKT3 mutation. The AKT3 mutation was found in both neuronal and nonneuronal cells indicating that the mutation occurred in neuroglial progenitor.

| Category                    | Available Options                                                                                                                                                                                                                                                                                                         |
|-----------------------------|---------------------------------------------------------------------------------------------------------------------------------------------------------------------------------------------------------------------------------------------------------------------------------------------------------------------------|
| Genome                      | <ul style="list-style-type: none"> <li>- Human (<i>hg19, hg18</i>)</li> <li>- Chimpanzee (<i>panTro4, panTro4</i>)</li> <li>- Mouse (<i>mm10, mm9</i>)</li> <li>- Rat (<i>rn5</i>)</li> <li>- Drosophila (<i>dm3</i>)</li> </ul>                                                                                          |
| Binning method              | <ul style="list-style-type: none"> <li>- Variable-size bins</li> <li>- Fixed-size bins</li> </ul>                                                                                                                                                                                                                         |
| Bin sizes                   | <ul style="list-style-type: none"> <li>- 10kb</li> <li>- 25kb</li> <li>- 50kb</li> <li>- 100kb</li> <li>- 175 kb</li> <li>- 250kb</li> <li>- 500kb</li> </ul>                                                                                                                                                             |
| Segmentation method         | <ul style="list-style-type: none"> <li>- Independent (<i>using normalized read counts</i>)</li> <li>- Global (<i>using sample with lowest IOD</i>)</li> <li>- Custom (<i>user specifies segmentation .bed file</i>)</li> </ul>                                                                                            |
| Clustering method           | <ul style="list-style-type: none"> <li>- Single</li> <li>- Complete</li> <li>- Average</li> <li>- Ward</li> <li>- Neighbor joining</li> </ul>                                                                                                                                                                             |
| Clustering distance metric  | <ul style="list-style-type: none"> <li>- Euclidian</li> <li>- Maximum</li> <li>- Manhattan</li> <li>- Canberra</li> <li>- Binary</li> <li>- Minkowski</li> </ul>                                                                                                                                                          |
| Masking "bad bins"          | <p>- Due to incomplete/incorrect reference assemblies a small number of bins near telomeric and centromeric regions show consistently inflated copy number states across all cells, healthy or otherwise. This option removes these artificial amplifications from the analysis. *Currently only available for human.</p> |
| Sex chromosome masking      | <ul style="list-style-type: none"> <li>- Binary option (whether or not to mask sex chromosomes during clustering)</li> </ul>                                                                                                                                                                                              |
| FACS copy number estimation | <ul style="list-style-type: none"> <li>- User uploads a file with ploidy estimates from FACS results that are used in tandem with our copy number estimation algorithm (not required).</li> </ul>                                                                                                                         |

**Supplementary Table 1: Data processing options**

| Simulated reads (millions) | Mapped reads (millions) | Mean bin length (kbp) | False Negative Rate (%) |        |          | False Positive Rate (%) |        |          |
|----------------------------|-------------------------|-----------------------|-------------------------|--------|----------|-------------------------|--------|----------|
|                            |                         |                       | Ginkgo Complete         | Ginkgo | CNVnator | Ginkgo Complete         | Ginkgo | CNVnator |
| 2.0                        | 1.64                    | 100                   | 0.15                    | 2.03   | 6.37     | 0.08                    | 1.28   | 0.69     |
| 2.0                        | 1.64                    | 50                    | 0.18                    | 1.29   | 5.86     | 0.07                    | 1.20   | 0.5      |
| 2.0                        | 1.64                    | 25                    | 0.26                    | 1.63   | 6.01     | 0.05                    | 1.16   | 0.54     |
| 1.5                        | 1.23                    | 100                   | 0.22                    | 2.22   | 6.46     | 0.10                    | 1.34   | 0.75     |
| 1.5                        | 1.23                    | 50                    | 0.28                    | 1.67   | 5.99     | 0.07                    | 1.21   | 0.66     |
| 1.5                        | 1.23                    | 25                    | 0.39                    | 2.37   | 6.1      | 0.08                    | 1.21   | 0.6      |
| 1.0                        | 0.82                    | 100                   | 0.33                    | 2.47   | 6.42     | 0.17                    | 1.41   | 0.94     |
| 1.0                        | 0.82                    | 50                    | 0.50                    | 2.17   | 6.23     | 0.13                    | 1.24   | 1.03     |
| 1.0                        | 0.82                    | 25                    | 0.75                    | 3.82   | 6.03     | 0.14                    | 1.24   | 0.68     |

### Supplementary Table 2: Simulation accuracy

False negative and false positive rates for genomes with 100 simulated copy number events at varying read depths and bin sizes. “Ginkgo complete” represents only the segments of copy number variants that fully overlap bin boundaries.

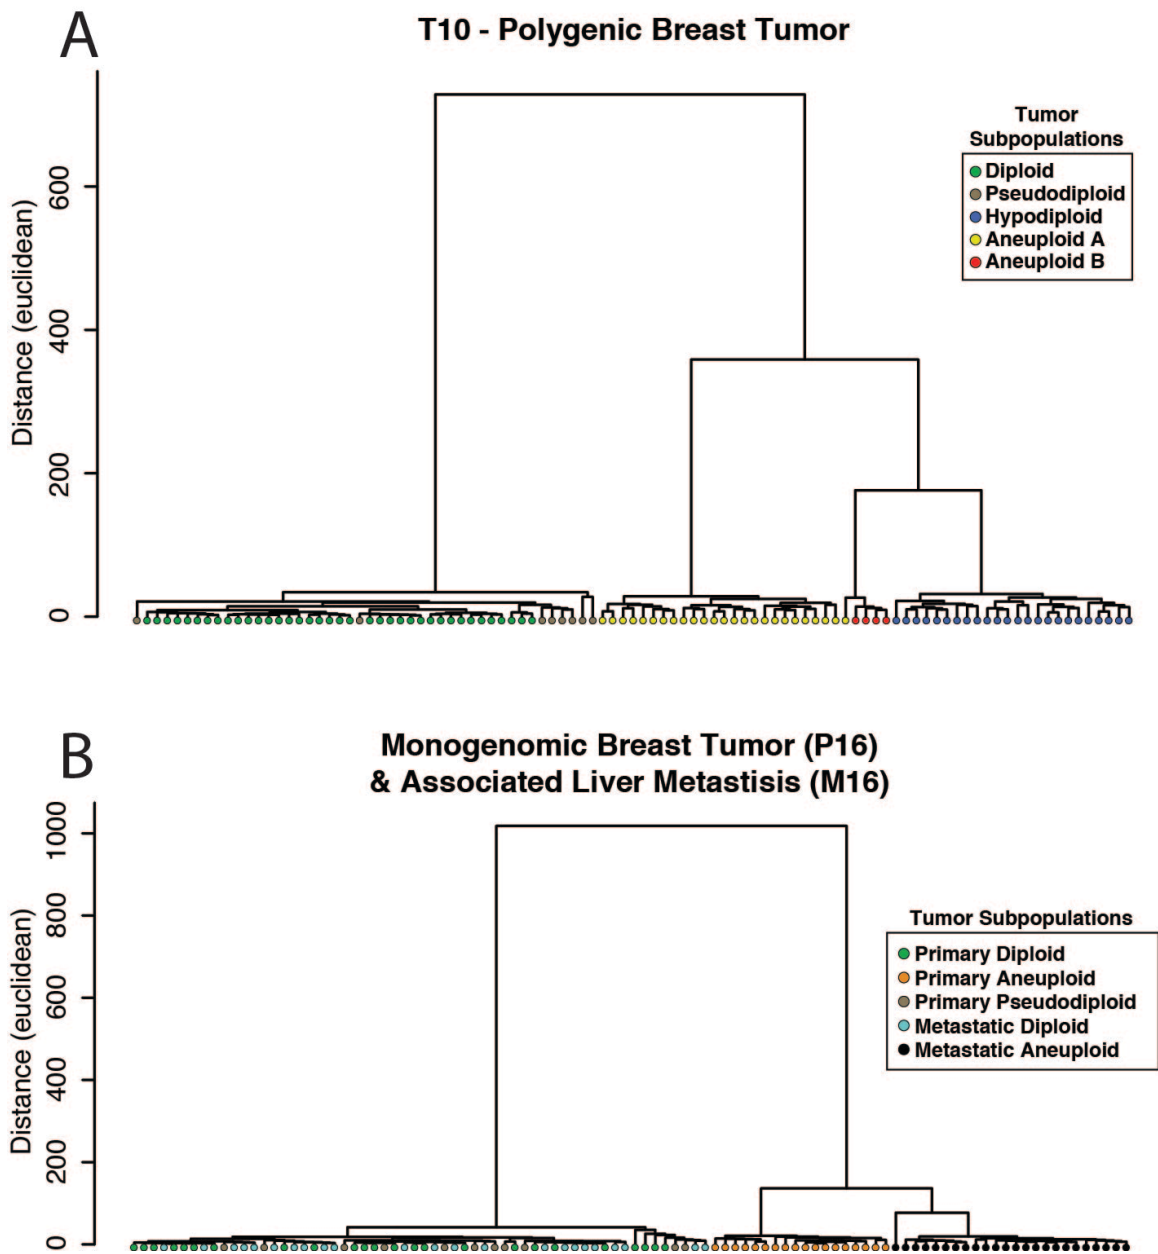

### Supplementary Figure 1: Ginkgo analysis of the Navin et al. cancer data

Phylogenetic trees generated through hierarchical clustering by copy-number using (A) 100 polygenic breast tumor samples (T10) and (B) 52 monogenic breast tumor (T16P) and 48 liver metastasis (T16M) samples. These results match the clonal structure published in the original study.



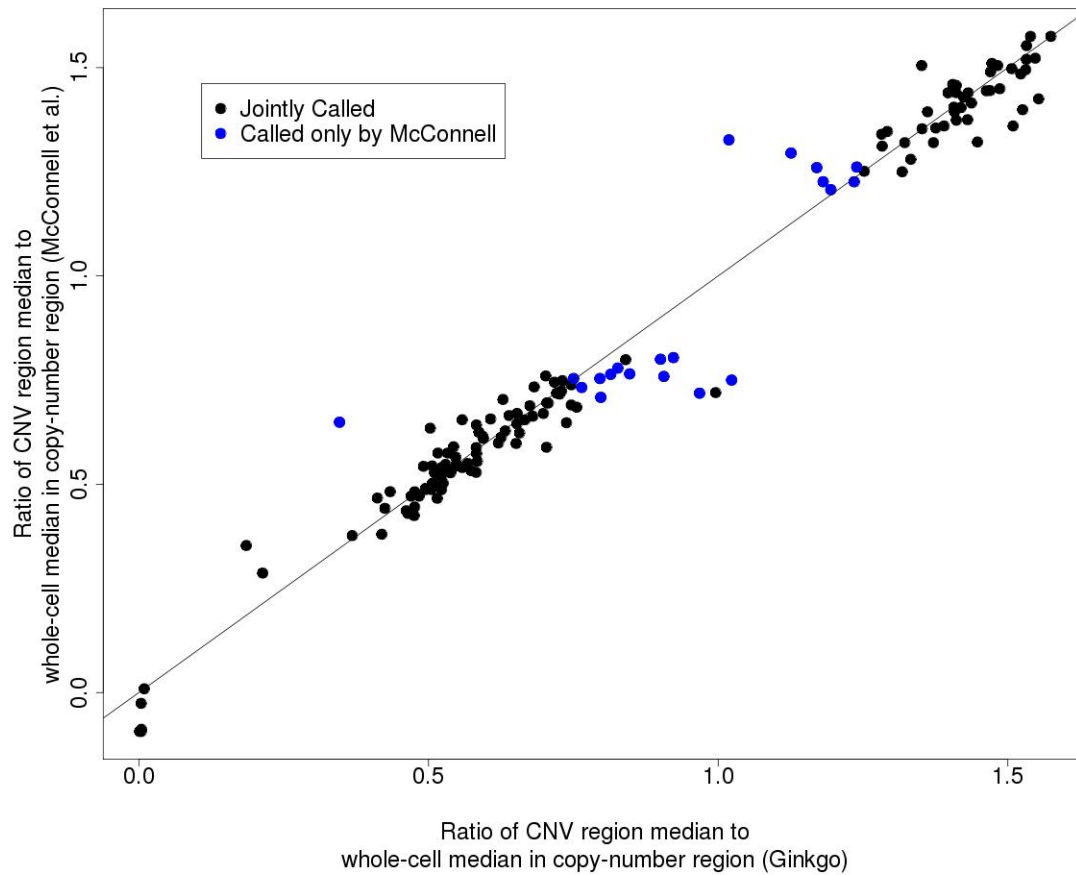

## Supplementary Figure 2A: Comparison of segment medians between Ginkgo and McConnell

Scatter plot showing correlation between events called by McConnell et al. and Ginkgo. Each data point represents, for a given CNV region in McConnell et al., the ratio of the segment median in that region to the segment median of the entire cell. Points labeled in blue correspond to the 20 segments that were called as CNVs by McConnell but called diploid by Ginkgo.

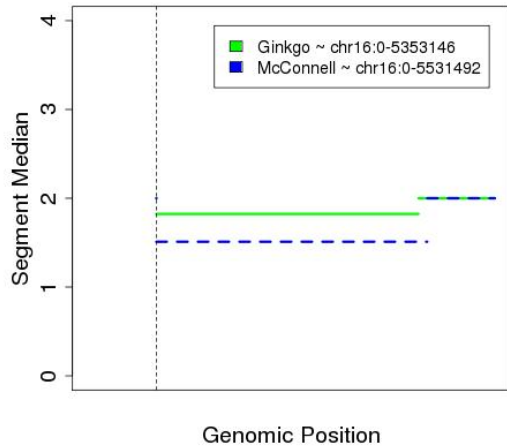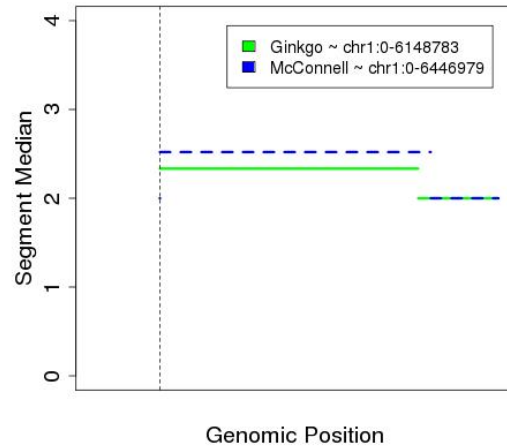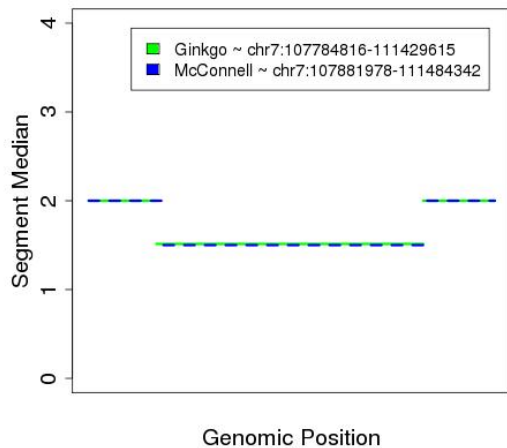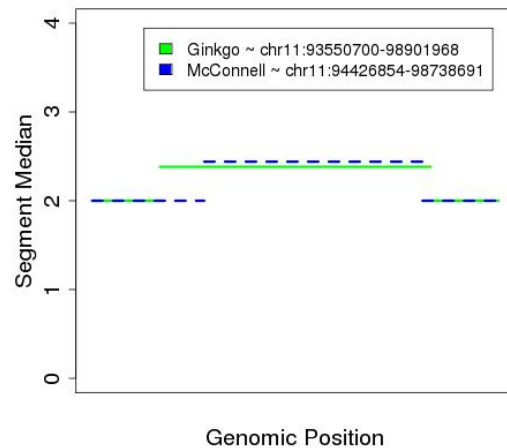

## Supplementary Figure 2B: Comparing discordant segments between Ginkgo and McConnell

**(Top)** The two regions with the most discordant median segment values that were called by McConnell but not Ginkgo. These CNVs are located at the start of chromosomes 1 and 16, in highly repetitive telomeric regions.

**(Bottom)** The two regions with the most concordant median segment values that were called by McConnell but not Ginkgo. Although small differences are clearly detected by Ginkgo in these regions, they are not marked as copy-number events due to differences between Ginkgo and McConnell's CNV calling thresholds.

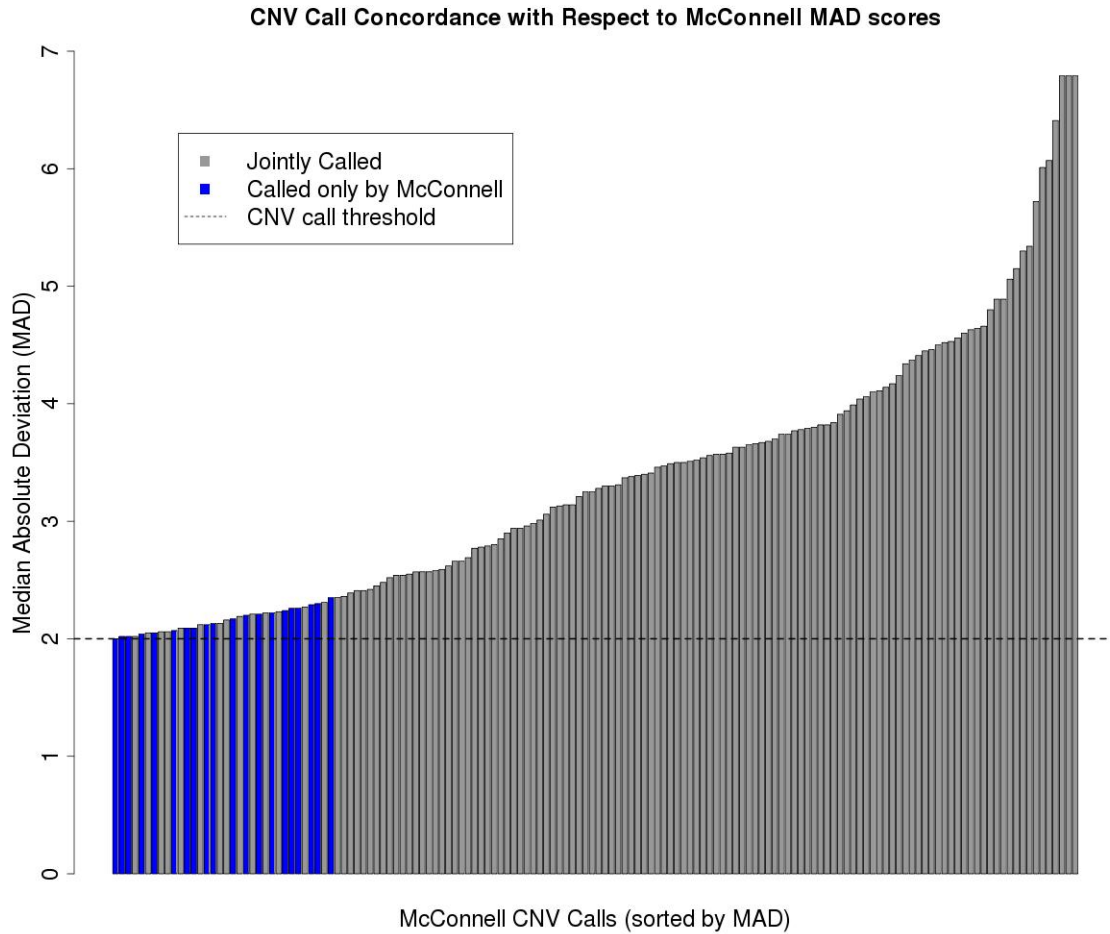

## Supplementary Figure 2C: An analysis of discordant calls with respect to McConnell MAD values

The 148 segments called by McConnell as CNVs rank-sorted by their MAD values. All 128 segments that are also called as CNVs by Ginkgo have higher MAD values (>2.35). All of the calls made exclusively by McConnell (colored in blue) lie right near their threshold for detection.

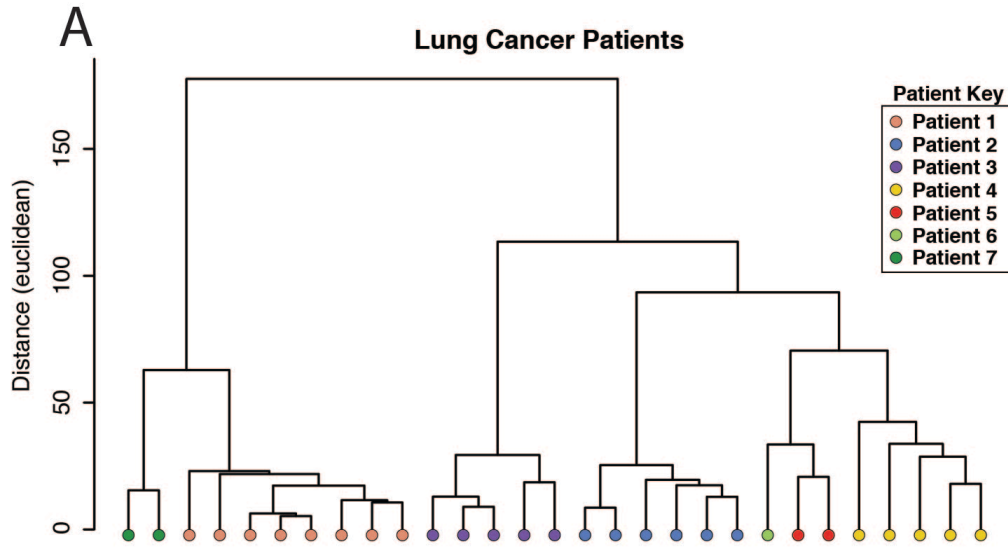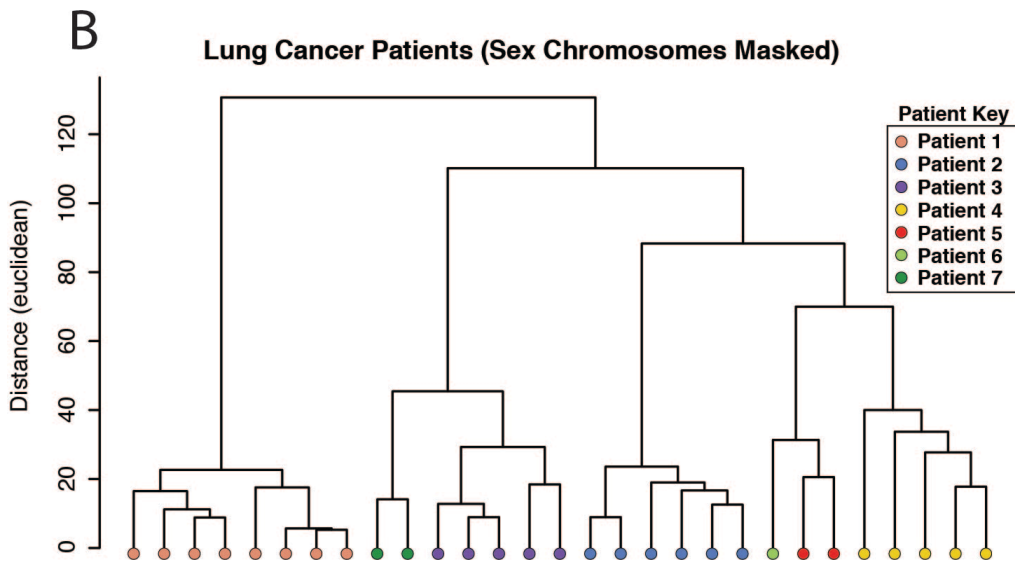

### Supplementary Figure 3: Ginkgo patient clustering of Ni et al. CTC data

(A). Hierarchical clustering by Ginkgo of 29 samples derived from 7 different patients with either adenocarcinoma (patients 2-6) or small cell lung cancer (patients 1, 7), matching the results published by Ni et al. (B) When sex chromosomes are masked, cells still cluster by patient, but patients no longer cluster by cancer subtype. In particular, after masking sex chromosomes, patient 3 is intermixed between patients 1 and 7 and there is no clear association between cancer types.

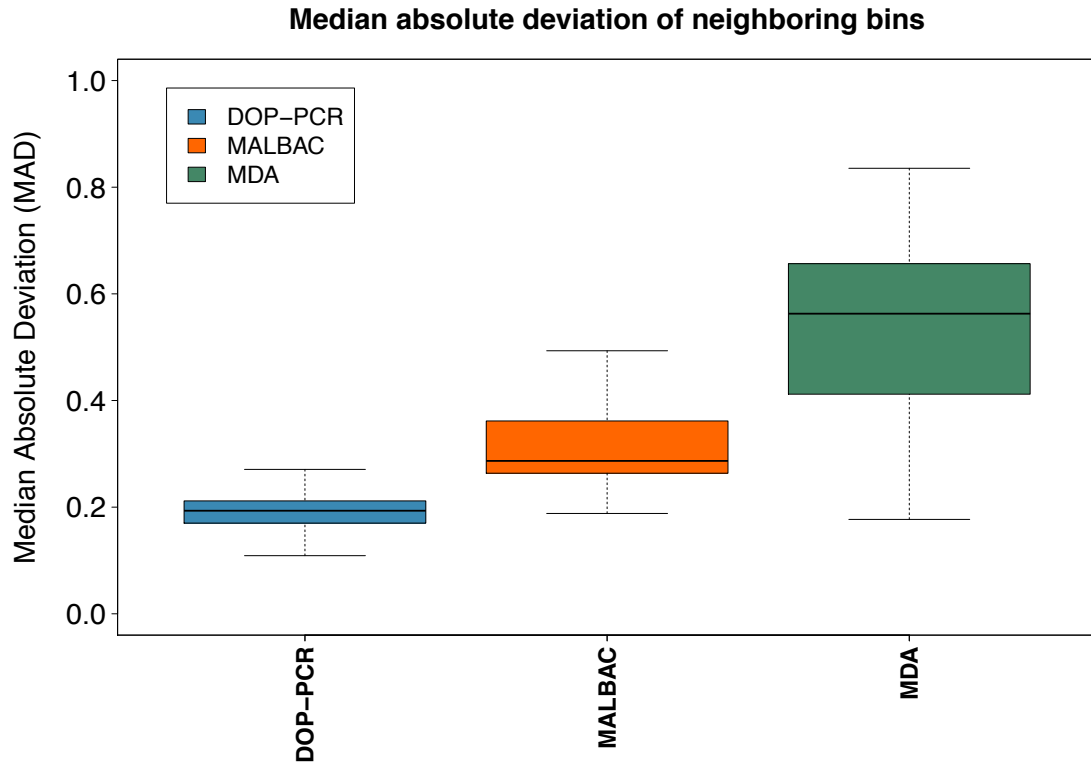

### Supplementary Figure 4: The median absolute deviation (MAD) of neighboring bins across 3 WGA approaches.

A single pair-wise MAD value is generated for each sample in a given dataset and represented by a box and whisker plot. The DOP-PCR datasets show the lowest mean MDA as well as the lowest variance across samples. While certain MDA samples outperform the MALBAC dataset, they show much large variability in data quality than MALBAC.

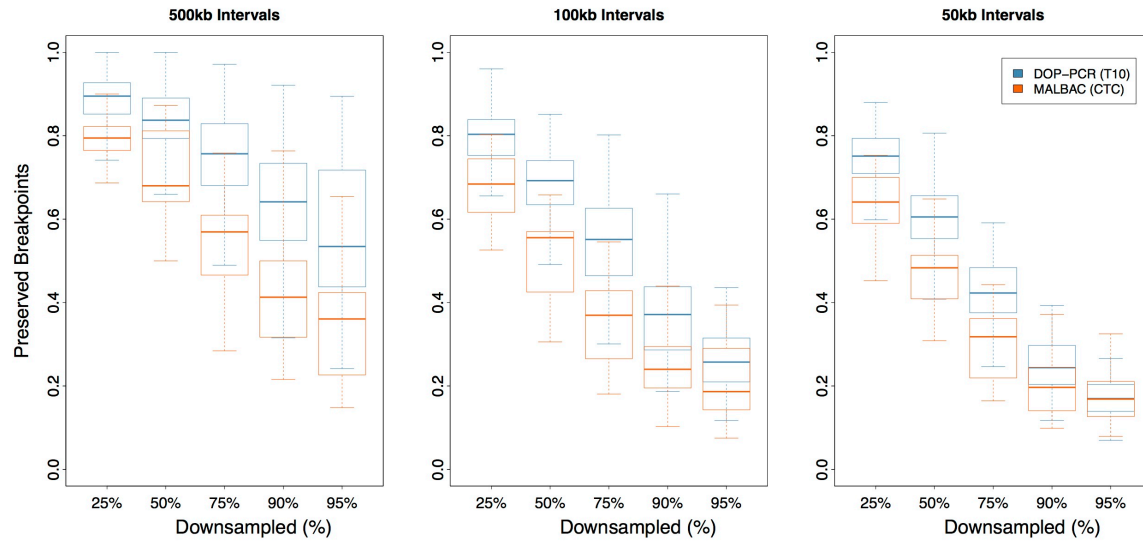

## Supplementary Figure 5: Comparing breakpoint conservation between T10 and CTC.

The fraction of breakpoints conserved between the full intact dataset and the dataset downsampled 25%, 50%, 75%, 90%, or 95% =using interval sizes of **(A)** 500kb, **(B)** 100kb, and **(C)** 50kb. T10 breakpoints are shown in blue and CTC breakpoints are shown in orange. At all levels of downsampling and all intervals sizes, the T10 DOP-PCR data retains a larger fraction of breakpoints than the CTC MALBAC data.

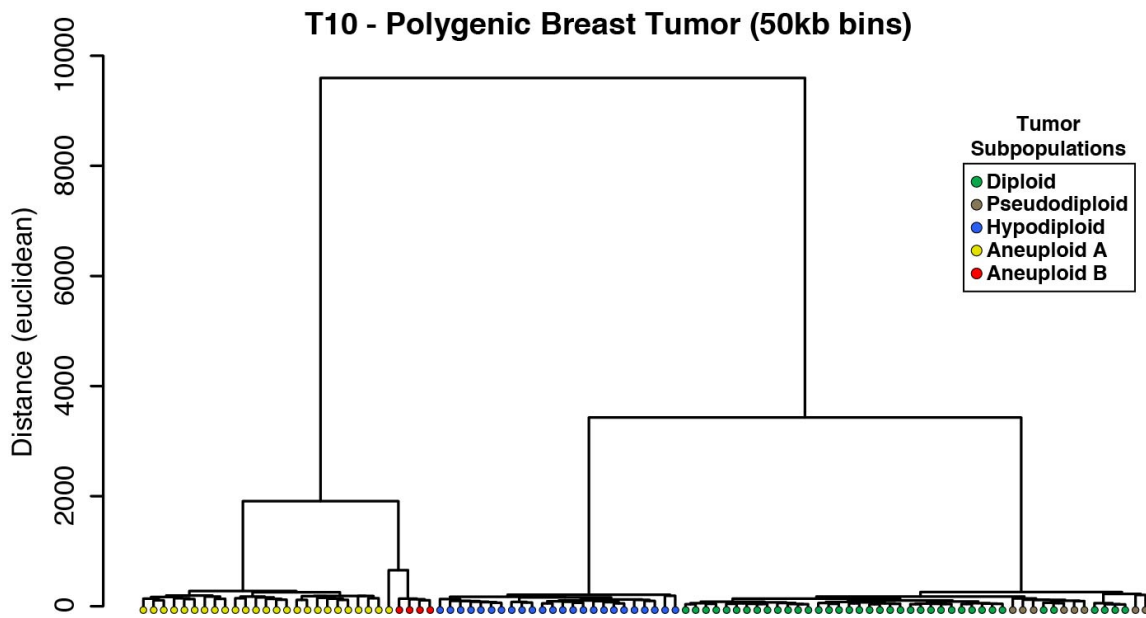

## Supplementary Figure 6: Phylogenetic tree of the T10 cell population

In this analysis, Ginkgo used a bin size of 50kb using the copy number profiles of individual cells. All of the clonal populations remain intact and represent the 500kb clustering results.

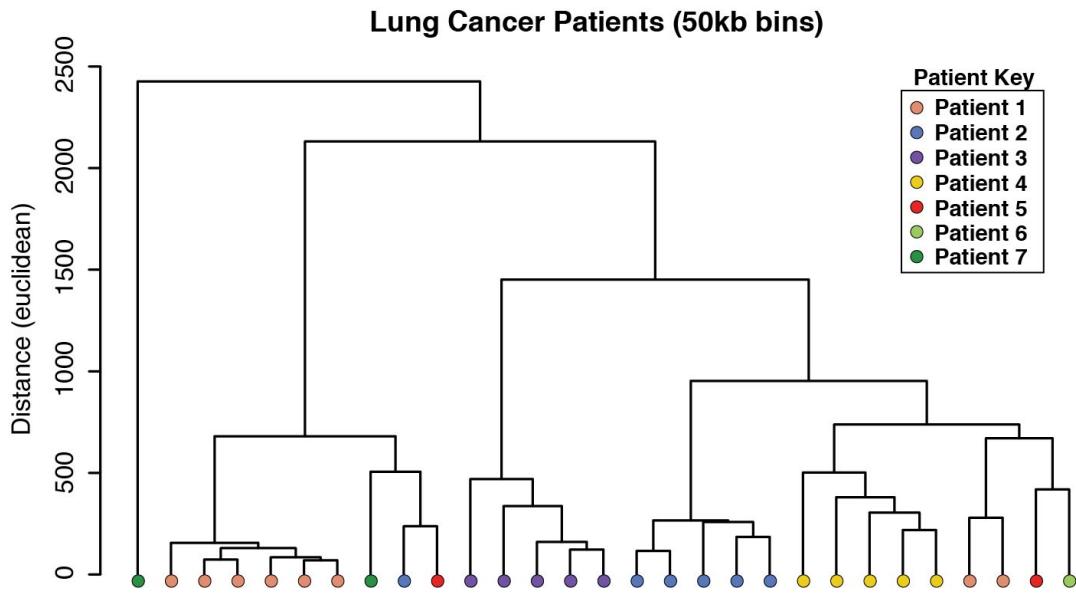

### Supplementary Figure 7: A phylogenetic tree of the CTC single cell samples

In this analysis, Ginkgo analyzed all 7 patients at a bin size of 50kb using the copy number profiles of the individual cells. Only cells from patients 2 and 4 can be correctly clustered at this bin resolution. The cells of the remaining patients no cluster together.



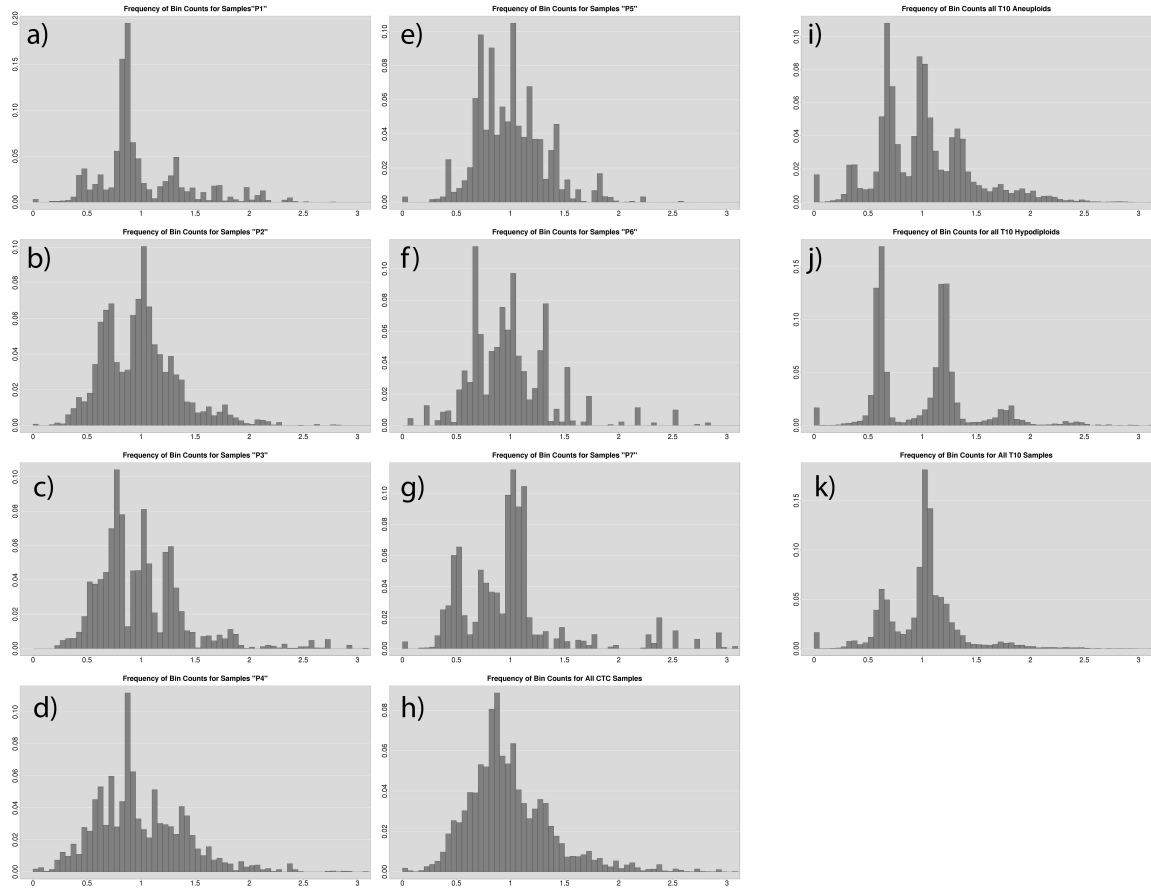

## Supplementary Figure 8: Histograms of normalized bin counts

This analysis was performed across (a-g) patients 1-7 respectively, (h) all CTC patients, (i) all T10 hypodiploid samples, (j) all T10 aneuploid samples, and (k) all T10 samples.

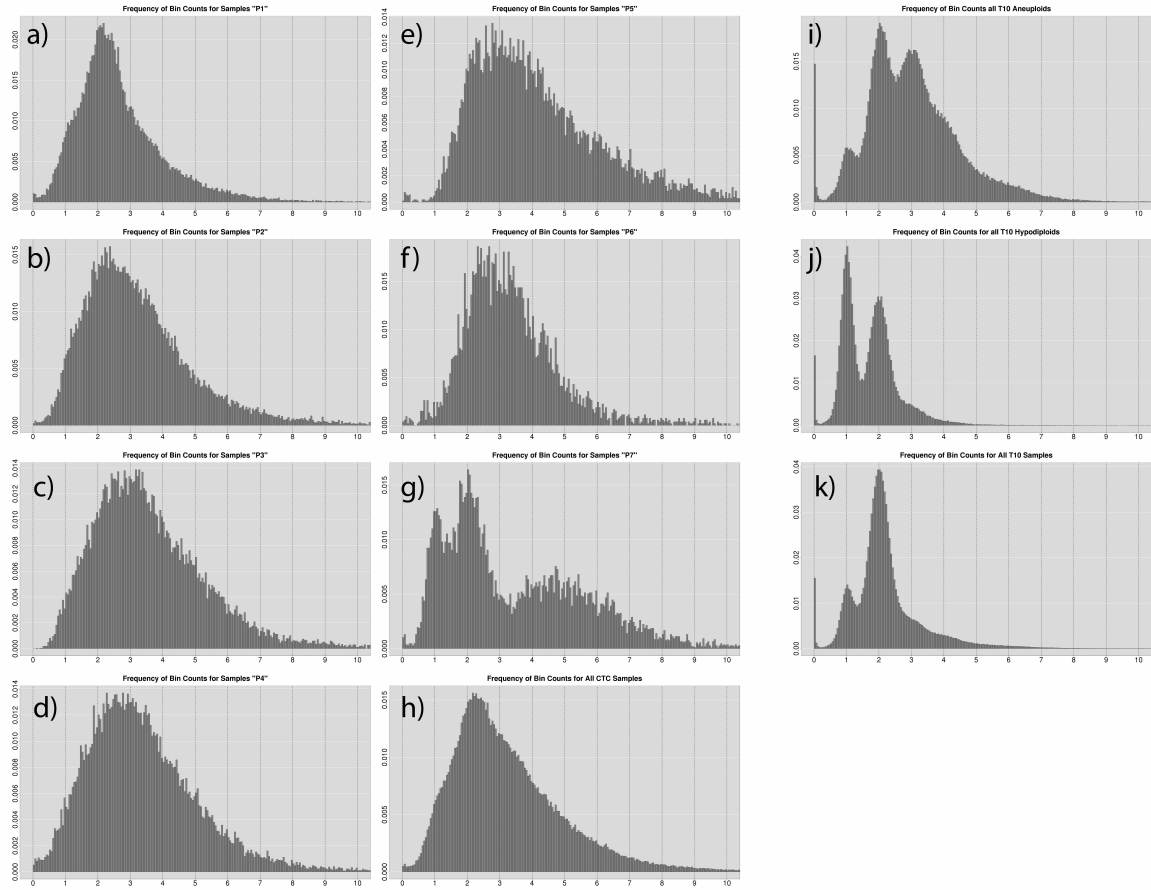

## Supplementary Figure 9: Histograms of the scaled bin counts

This analysis was performed across **(a-g)** patients 1-7 respectively, **(h)** all CTC patients, **(i)** all T10 hypodiploid samples, **(j)** all T10 aneuploid samples, and **(k)** all T10 samples.

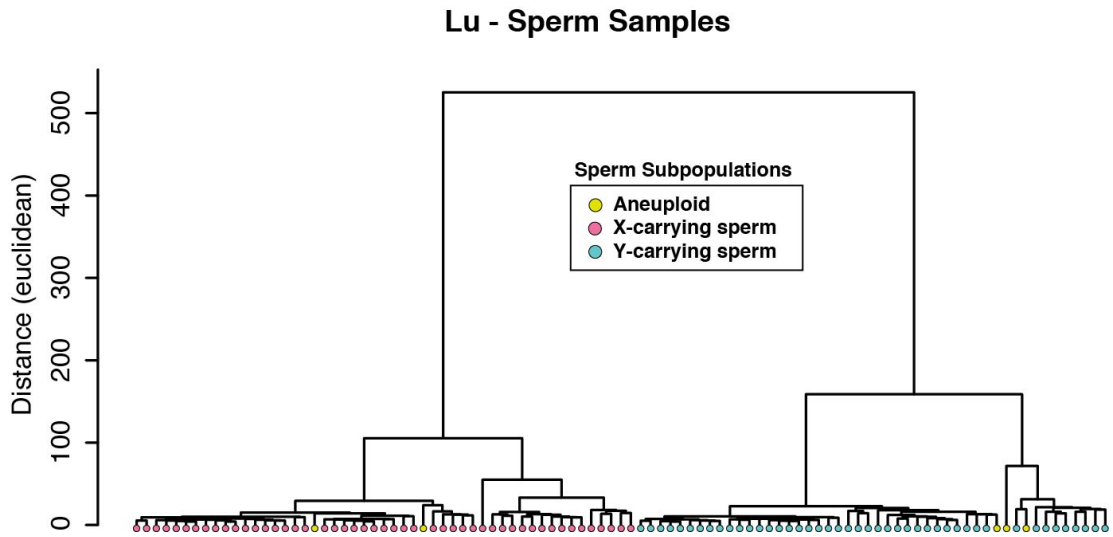

## Supplementary Figure 10: Ginkgo clusters the Lu *et al.* sperm samples

The major populations are defined by x- and y-carrying sperm. The original study identified 5 aneuploid cells (shown in yellow) with copy-number aberrations. Ginkgo is able to identify the same variants in the 5 aneuploid cells.
